# Supplementary material for: Insights into the genetic diversity of indigenous goats and their conservation priorities
Source: PubMed Central journal article supplement (PMC6718908; doi:10.5713/ajas.18.0737), 2019-02-09
Supplement: ajas-18-0737-suppl.pdf [file ajas-18-0737-suppl.pdf]

1 **Table S1: Observed ( $N_A$ ) and effective ( $N_E$ ) number of alleles, observed ( $H_O$ ) and expected ( $H_E$ )**  
 2 **heterozygosities and F-statistics ( $F_{IS}$ ,  $F_{ST}$  AND  $F_{IT}$ ) across the 26 goat breeds.**

| Locus       | $N_A$       | $N_E$       | $H_O$       | $H_E$       | $F_{IS}$    | $F_{IT}$    | $F_{ST}$    |
|-------------|-------------|-------------|-------------|-------------|-------------|-------------|-------------|
| CSRD247     | 6.923±0.396 | 4.037±0.281 | 0.65±0.034  | 0.714±0.023 | 0.090       | 0.200       | 0.120       |
| ETH10       | 2.923±0.214 | 1.575±0.107 | 0.357±0.069 | 0.291±0.045 | -0.224      | 0.043       | 0.218       |
| MAF209      | 2.308±0.092 | 1.393±0.06  | 0.269±0.041 | 0.25±0.03   | -0.074      | 0.108       | 0.169       |
| OARAE54     | 7.346±0.47  | 2.866±0.231 | 0.59±0.031  | 0.604±0.026 | 0.023       | 0.186       | 0.167       |
| SRCRSP15    | 4.923±0.207 | 2.539±0.14  | 0.542±0.023 | 0.576±0.022 | 0.060       | 0.192       | 0.140       |
| SRCRSP3     | 4.615±0.215 | 2.675±0.158 | 0.528±0.032 | 0.586±0.028 | 0.100       | 0.262       | 0.180       |
| SRCRSP5     | 7.077±0.376 | 3.732±0.262 | 0.677±0.03  | 0.684±0.028 | 0.010       | 0.147       | 0.139       |
| TGLA53      | 6.423±0.434 | 2.95±0.253  | 0.384±0.038 | 0.602±0.031 | 0.362       | 0.460       | 0.153       |
| DRBP1       | 7.615±0.464 | 4.265±0.217 | 0.362±0.024 | 0.75±0.013  | 0.517       | 0.566       | 0.101       |
| ILSTS087    | 7.769±0.279 | 4.784±0.304 | 0.721±0.026 | 0.764±0.019 | 0.056       | 0.155       | 0.105       |
| INRABERN172 | 5.077±0.199 | 2.701±0.125 | 0.576±0.03  | 0.608±0.02  | 0.052       | 0.132       | 0.085       |
| MAF065      | 7.192±0.451 | 3.947±0.213 | 0.71±0.022  | 0.728±0.014 | 0.025       | 0.104       | 0.081       |
| MCM527      | 5.808±0.328 | 2.812±0.17  | 0.609±0.032 | 0.614±0.021 | 0.008       | 0.089       | 0.082       |
| OARFCB20    | 6.154±0.264 | 3.206±0.184 | 0.595±0.043 | 0.65±0.028  | 0.085       | 0.211       | 0.138       |
| SPS113      | 6.115±0.262 | 3.469±0.2   | 0.673±0.025 | 0.683±0.022 | 0.013       | 0.122       | 0.110       |
| SRCRSP8     | 6.808±0.38  | 4.053±0.233 | 0.554±0.049 | 0.733±0.015 | 0.244       | 0.332       | 0.116       |
| ILSTS029    | 7.154±0.609 | 3.274±0.312 | 0.653±0.036 | 0.624±0.032 | -0.046      | 0.153       | 0.190       |
| INRA023     | 5.923±0.517 | 3.224±0.304 | 0.506±0.05  | 0.62±0.031  | 0.183       | 0.413       | 0.281       |
| INRA063     | 6.346±0.415 | 3.384±0.304 | 0.415±0.04  | 0.642±0.031 | 0.354       | 0.493       | 0.215       |
| INRABERN185 | 4.000±0.222 | 2.075±0.117 | 0.469±0.036 | 0.487±0.023 | 0.037       | 0.309       | 0.282       |
| P19(DYA)    | 6.577±0.416 | 3.482±0.261 | 0.636±0.027 | 0.674±0.023 | 0.057       | 0.170       | 0.120       |
| SRCRSP23    | 7.654±0.61  | 3.721±0.333 | 0.709±0.032 | 0.676±0.028 | -0.048      | 0.120       | 0.160       |
| SRCRSP9     | 7.577±0.315 | 4.002±0.178 | 0.724±0.045 | 0.738±0.011 | 0.019       | 0.140       | 0.123       |
| TCRVB6      | 8.731±0.406 | 3.858±0.302 | 0.551±0.033 | 0.705±0.02  | 0.218       | 0.309       | 0.116       |
| BM6444      | 12.385±0.60 | 6.202±0.299 | 0.564±0.037 | 0.827±0.01  | 0.319       | 0.382       | 0.093       |
| ILSTS011    | 6.385±0.249 | 3.306±0.173 | 0.669±0.035 | 0.675±0.019 | 0.009       | 0.104       | 0.096       |
| ILSTS005    | 4.769±0.231 | 2.827±0.119 | 0.666±0.03  | 0.63±0.016  | -0.057      | 0.062       | 0.113       |
| SRCRSP7     | 3.846±0.205 | 2.517±0.13  | 0.472±0.045 | 0.571±0.026 | 0.174       | 0.285       | 0.135       |
| OARFCB48    | 6.462±0.397 | 3.931±0.279 | 0.785±0.031 | 0.716±0.018 | -0.096      | 0.010       | 0.097       |
| MAF70       | 7.115±0.339 | 3.746±0.237 | 0.707±0.027 | 0.706±0.018 | 0.000       | 0.111       | 0.111       |
| Mean        | 6.333±0.094 | 3.352±0.053 | 0.577±0.008 | 0.638±0.006 | 0.082±0.029 | 0.212±0.026 | 0.141±0.010 |

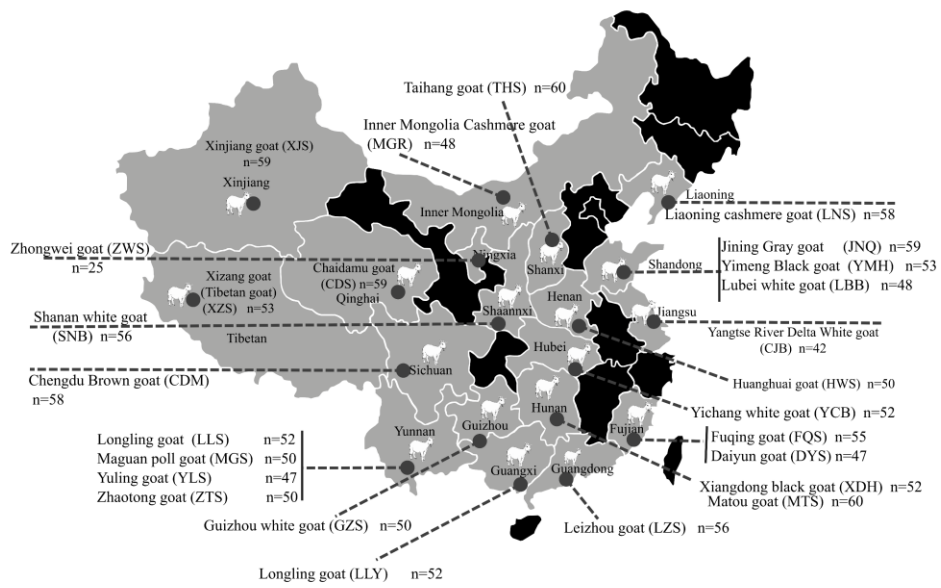

555

556 **Supplementary Figure S1.** The distribution of the 26 Chinese indigenous goat populations.

557

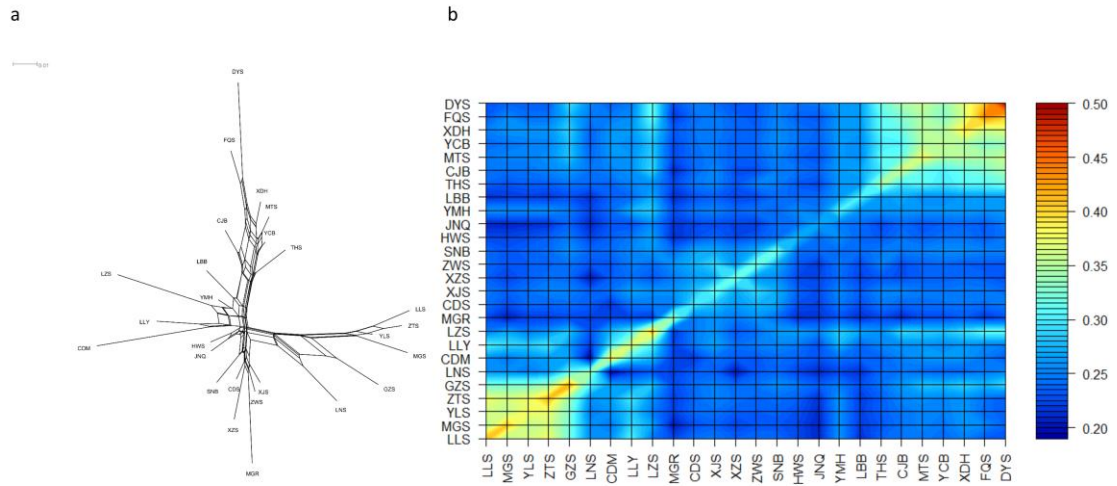

558

559 **Supplementary Figure S2.** (a) Neighbor-net graph of Reynolds' distance. (b) Contour plots of average

560 co-ancestries ( $f_m$ ). Breed acronyms are defined in Figure 1.

561

562
